# Supplementary material
Source: Springer Nature journal article supplement (https://www.springermedizin.de/resource/supplementary/13058_2011_3159_MOESM7_ESM.pdf/9703330)

**A.**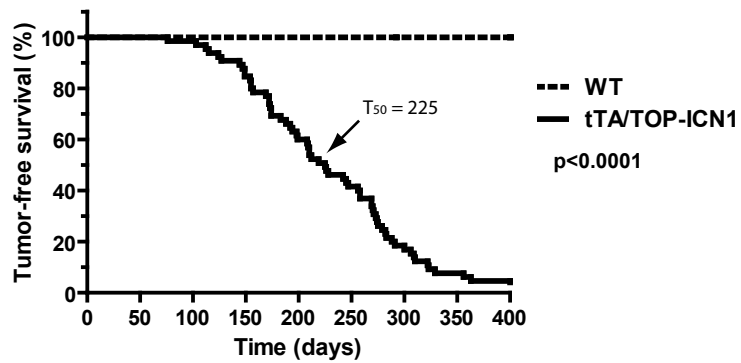**B.**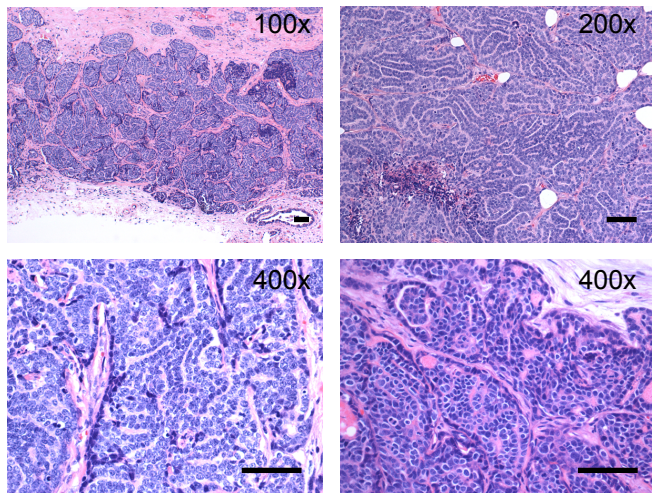**C.**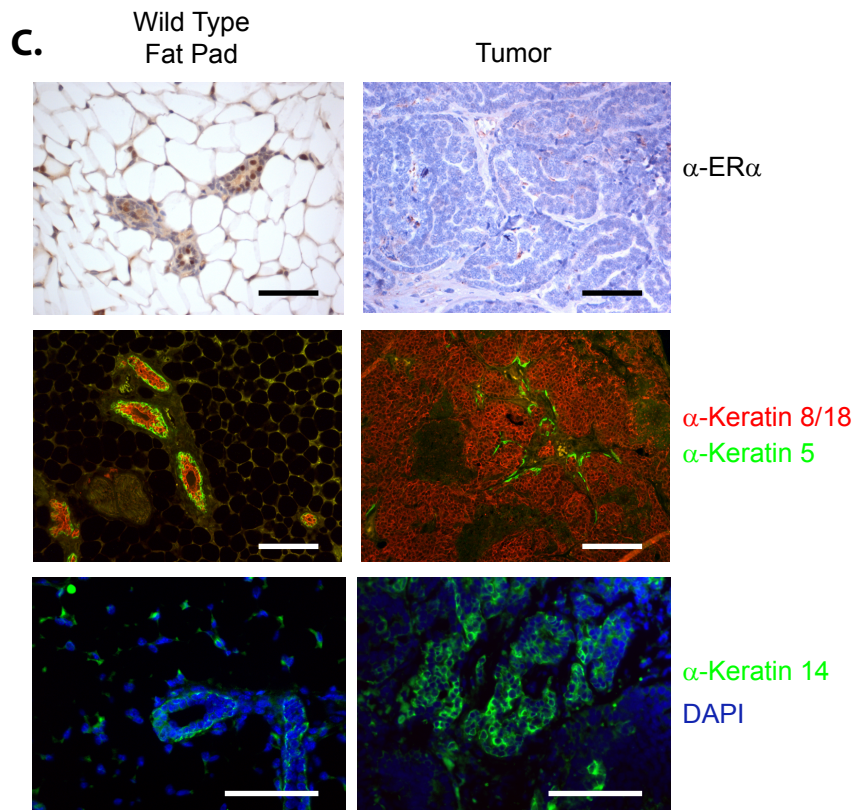

Supplement: MOESM7 [file 9703330]
